# Supplementary material
Source: PubMed Central journal article supplement (PMC6156995)
Supplement: NIHMS970039-supplement-supplement_1.pdf [file NIHMS970039-supplement-supplement_1.pdf]

1 Supplemental Table 1: Covariates considered for multivariable regression

| Potential covariates                | Number of models | Percent Missing Data |
|-------------------------------------|------------------|----------------------|
| Postoperative atrial fibrillation   | 6                | 0%                   |
| Preoperative ventricular arrhythmia | 3                | 0%                   |
| Age                                 | 3                | 0%                   |
| Preoperative inotropes              | 0                | 0%                   |
| Last creatinine                     | 3                | 0%                   |
| Last hematocrit                     | 4                | 0.2%                 |
| Last platelet count                 | 1                | 0.2%                 |
| Total bilirubin                     | 3                | 0.8%                 |
| Last INR                            | 1                | 0.6%                 |
| Total albumin                       | 4                | 1.0%                 |
| Heart Mate II device                | 1                | 0%                   |
| LVAD volume by center               | 1                | 0%                   |
| Year                                | 1                | 0%                   |

2 LVAD=left ventricular assist device

3

4

5 Supplemental Table 2. Multivariable logistic regression for operative mortality

| Covariate                         | OR    | 95% Confidence Interval |       | p-value |
|-----------------------------------|-------|-------------------------|-------|---------|
| Postoperative atrial fibrillation | 0.977 | 0.510                   | 1.872 | 0.9443  |
| Total bilirubin                   | 1.164 | 0.934                   | 1.45  | 0.1764  |
| Last creatinine                   | 1.335 | 0.909                   | 1.961 | 0.1412  |
| Age                               | 1.028 | 1.005                   | 1.052 | 0.0186  |
| Total albumin                     | 0.643 | 0.38                    | 1.088 | 0.0996  |
| LVAD volume by center             | 1.005 | 0.998                   | 1.013 | 0.1659  |
| Last hematocrit                   | 0.948 | 0.902                   | 0.996 | 0.0355  |

6 LVAD=left ventricular assist device

7

8

9

10 Supplemental Table 3. Multivariable logistic regression for major morbidity

| Covariate                         | OR    | 95% Confidence Interval |       | p-value |
|-----------------------------------|-------|-------------------------|-------|---------|
| Postoperative atrial fibrillation | 2.464 | 1.494                   | 4.063 | 0.0004  |
| Total bilirubin                   | 1.370 | 1.041                   | 1.802 | 0.0245  |
| Last INR                          | 0.620 | 0.337                   | 1.142 | 0.1250  |
| Last creatinine                   | 1.311 | 0.913                   | 1.883 | 0.1428  |
| Preoperative inotropes            | 1.296 | 0.844                   | 1.990 | 0.2358  |
| LVAD volume by center             | 1.003 | 0.998                   | 1.008 | 0.1821  |
| Last platelet count               | 0.998 | 0.995                   | 1.000 | 0.0431  |
| Last hematocrit                   | 0.948 | 0.918                   | 0.979 | 0.0013  |

11 LVAD=left ventricular assist device

12

13

14

15 Supplemental Table 4. Multivariable logistic regression for permanent stroke

| Covariate                         | OR    | 95% Confidence Interval |       | p-value |
|-----------------------------------|-------|-------------------------|-------|---------|
| Postoperative atrial fibrillation | 1.189 | 0.416                   | 3.399 | 0.7471  |
| Last hematocrit                   | 0.886 | 0.818                   | 0.960 | 0.0032  |

16

17

18

19

20 Supplemental Table 5. Multivariable logistic regression for unplanned RVAD

| Covariate                         | OR    | 95% Confidence Interval | p-value |
|-----------------------------------|-------|-------------------------|---------|
| Postoperative atrial fibrillation | 2.900 | 1.296 6.49              | 0.0096  |
| Last creatinine                   | 1.472 | 0.932 2.326             | 0.0973  |
| Total albumin                     | 2.900 | 1.296 6.49              | 0.0096  |

21  
22  
23

24 Supplemental Table 6. Multivariable logistic regression for renal failure

| Covariate                         | OR    | 95% Confidence Interval | p-value |
|-----------------------------------|-------|-------------------------|---------|
| Postoperative atrial fibrillation | 1.963 | 0.972 3.967             | 0.0602  |
| Total bilirubin                   | 1.868 | 1.24 2.813              | 0.0028  |
| Last creatinine                   | 1.022 | 0.995 1.051             | 0.1108  |
| Age                               | 1.573 | 1.193 2.074             | 0.0013  |

25  
26  
27

28 Supplemental Table 7. Multivariable logistic regression for cardiac arrest

| Covariate                         | OR    | 95% Confidence Interval | p-value |
|-----------------------------------|-------|-------------------------|---------|
| Postoperative atrial fibrillation | 3.423 | 1.207 9.706             | 0.0207  |
| Last creatinine                   | 0.383 | 0.098 1.501             | 0.1683  |

29  
30  
31

32 Supplemental Table 8. Multivariable logistic regression for discharge to facility

| Covariate                           | OR    | 95% Confidence Interval | p-value |
|-------------------------------------|-------|-------------------------|---------|
| Postoperative atrial fibrillation   | 2.234 | 1.246 4.006             | 0.0070  |
| Preoperative ventricular arrhythmia | 1.897 | 1.09 3.301              | 0.0235  |
| Preoperative inotropes              | 1.818 | 0.947 3.487             | 0.0723  |
| Age                                 | 1.037 | 1.014 1.061             | 0.0019  |
| LVAD volume by center               | 1.004 | 0.997 1.01              | 0.2846  |
| Last hematocrit                     | 0.924 | 0.882 0.968             | 0.0009  |

33  
34  
35

36 Supplemental Table 9. Multivariable linear regression for intensive care unit length of stay

| Covariate                           | Estimate  | 95% Confidence Limits | p-value |
|-------------------------------------|-----------|-----------------------|---------|
| Postoperative atrial fibrillation   | 87.74839  | 22.49032 153.00646    | 0.0085  |
| Preoperative ventricular arrhythmia | 73.77964  | 15.00512 132.55417    | 0.014   |
| Total bilirubin                     | 22.92516  | 0.6107 45.23962       | 0.0441  |
| Last INR                            | -16.70814 | -75.20648 41.7902     | 0.5749  |
| Last creatinine level               | 67.24387  | 22.36706 112.12068    | 0.0034  |
| Preoperative inotropes              | 8.38774   | -52.15811 68.93358    | 0.7856  |
| Age                                 | 0.58443   | -1.54488 2.71375      | 0.5899  |
| Total albumin                       | -56.79544 | -102.88376 -10.70712  | 0.0158  |
| LVAD volume by center               | -0.55471  | -1.28446 0.17504      | 0.1359  |
| Last platelet                       | -0.10935  | -0.41307 0.19437      | 0.4796  |
| Last hematocrit                     | -0.81524  | -5.26905 3.63857      | 0.7192  |
| HeartMate II device                 | -59.93832 | -126.05372 6.17708    | 0.0755  |
| Year                                | 1.55119   | -15.44528 18.54767    | 0.8577  |

37 INR=international normalized ratio; LVAD=left ventricular assist device

38

39 Supplemental Table 10. Multivariable linear regression for postoperative length of stay

| Covariate                           | Estimate | 95% Confidence Limits |         | p-value |
|-------------------------------------|----------|-----------------------|---------|---------|
| Postoperative atrial fibrillation   | 4.9437   | 0.72892               | 9.15848 | 0.0216  |
| Preoperative ventricular arrhythmia | 1.50535  | -2.30008              | 5.31077 | 0.4374  |
| Total bilirubin                     | 0.01504  | -1.43069              | 1.46077 | 0.9837  |
| Last INR                            | -2.48553 | -6.2766               | 1.30553 | 0.1983  |
| Last creatinine level               | 6.29445  | 3.38812               | 9.20078 | <0.0001 |
| Preoperative inotropes              | 2.40755  | -1.47624              | 6.29133 | 0.2238  |
| Age                                 | 0.02886  | -0.10747              | 0.16519 | 0.6776  |
| Total albumin                       | -2.87937 | -5.85481              | 0.09606 | 0.0578  |
| LVAD volume by center               | 0.02452  | -0.02276              | 0.0718  | 0.3087  |
| Last platelet                       | -0.01462 | -0.03417              | 0.00492 | 0.1422  |
| Last Hematocrit                     | -0.06158 | -0.34999              | 0.22683 | 0.675   |
| HeartMate II device                 | -2.55351 | -6.81143              | 1.70442 | 0.2392  |
| Year                                | -0.93325 | -2.02661              | 0.16011 | 0.0942  |

40 INR=international normalized ratio; LVAD=left ventricular assist device

41

42

43 Supplemental Table 11. Multivariable linear regression for intensive care unit cost

| Covariate                           | Estimate  | 95% Confidence Limits |           | p-value |
|-------------------------------------|-----------|-----------------------|-----------|---------|
| Postoperative atrial fibrillation   | 5488.22   | -2538.8               | 13515     | 0.1797  |
| Preoperative ventricular arrhythmia | 7664.69   | 372.8267              | 14957     | 0.0394  |
| Total bilirubin                     | 2315.59   | -394.608              | 5025.794  | 0.0938  |
| Last INR                            | -916.897  | -9471.28              | 7637.49   | 0.8333  |
| Last creatinine level               | 11427     | 5893.278              | 16961     | <0.0001 |
| Preoperative inotropes              | 4999.05   | -2350                 | 12348     | 0.1819  |
| Age                                 | -49.7071  | -307.374              | 207.9594  | 0.7048  |
| Total albumin                       | -11123    | -16771                | -5474.16  | 0.0001  |
| LVAD volume by center               | -112.678  | -205.429              | -19.9274  | 0.0174  |
| Last platelet                       | -8.95529  | -46.2938              | 28.3832   | 0.6376  |
| Last hematocrit                     | -316.1071 | -868.77372            | 236.55953 | 0.2616  |
| HeartMate II device                 | -12183    | -20297                | -4069.02  | 0.0033  |
| Year                                | -4258.5   | -6496.73              | -2020.33  | 0.0002  |

44 INR=international normalized ratio; LVAD=left ventricular assist device

45

46

47 Supplemental Table 12. Multivariable linear regression for total hospital cost

| Covariate                           | Estimate | 95% Confidence Limits |          | p-value |
|-------------------------------------|----------|-----------------------|----------|---------|
| Postoperative atrial fibrillation   | 19183    | -16918                | 55283    | 0.2969  |
| Preoperative ventricular arrhythmia | 10637    | -22158                | 43431    | 0.5242  |
| Total bilirubin                     | 12156    | -32.3236              | 24345    | 0.0506  |
| Last INR                            | -52569   | -91041                | -14097   | 0.0075  |
| Last creatinine level               | 26023    | 1134.969              | 50910    | 0.0405  |
| Preoperative inotropes              | 10269    | -22783                | 43320    | 0.5418  |
| Age                                 | 557.096  | -601.73               | 1715.921 | 0.3453  |
| Total albumin                       | -32356   | -57759                | -6952.21 | 0.0127  |
| LVAD volume by center               | 108.0781 | -309.058              | 525.2141 | 0.6109  |
| Last platelet                       | -56.5075 | -224.433              | 111.4181 | 0.5087  |
| Last hematocrit                     | -2373.61 | -4859.16              | 111.946  | 0.0612  |
| HeartMate II device                 | -31116   | -67608                | 5375.19  | 0.0945  |
| Year                                | 3151.24  | -6914.79              | 13217    | 0.5387  |

48 INR=international normalized ratio; LVAD=left ventricular assist device
